# Supplementary material
Source: HighWire-hosted journal article supplement (https://cancerdiscovery.aacrjournals.org/content/suppl/2012/11/16/2159-8290.CD-12-0353)
Supplement: F7_27K.pdf [file F7_27K.pdf]

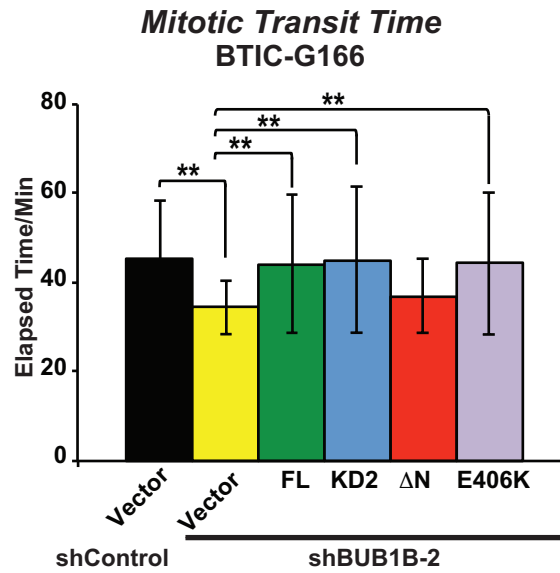

**Figure S7. Measurement of mitotic transit times BTIC-G166 cells using live microscopy for mBUB1B allelic complementation experiments (from Figure 5).** Average mitotic transit times (elapsed time from nuclear envelope break down to cytokinesis) are shown for each complementation trial ( $n > 80$  mitotic cells). \*\* indicates  $p < .001$  by student's t-test.
